# Supplementary material for: Risk factors and protective factors associated with incident or increase of frailty among community-dwelling older adults: A systematic review of longitudinal studies
Source: PubMed Central journal article supplement (PMC5472269; doi:10.1371/journal.pone.0178383), 2017-06-15
Supplement: pone.0178383.s002.pdf [file pone.0178383.s002.pdf]

**S2 Table. Quality assessment results of the included studies**

| NO.                                                  | 1  | 2  | 3  | 4  | 5  | 6  | 7  | 8  | 9  | 10 | 11 | 12 | 13 | 14 | 15 | 16 | 17 | 18 | 19 | 20 | 21 | 22 | 23 |    |
|------------------------------------------------------|----|----|----|----|----|----|----|----|----|----|----|----|----|----|----|----|----|----|----|----|----|----|----|----|
| 1. Objectives stated                                 | Y  | Y  | Y  | Y  | Y  | Y  | Y  | Y  | Y  | Y  | Y  | Y  | N  | N  | Y  | Y  | Y  | Y  | Y  | Y  | Y  | Y  | Y  | Y  |
| 2. Target population defined                         | Y  | Y  | Y  | Y  | Y  | Y  | Y  | Y  | Y  | Y  | Y  | Y  | Y  | Y  | Y  | Y  | Y  | Y  | Y  | Y  | Y  | Y  | Y  | Y  |
| 3. Sampling frame defined                            | Y  | Y  | Y  | Y  | Y  | Y  | Y  | Y  | Y  | Y  | Y  | Y  | Y  | N  | Y  | Y  | Y  | Y  | Y  | Y  | Y  | Y  | Y  | N  |
| 4. Study population defined?                         | Y  | Y  | Y  | Y  | Y  | Y  | Y  | Y  | Y  | Y  | Y  | Y  | Y  | Y  | Y  | Y  | Y  | Y  | Y  | Y  | Y  | Y  | Y  | Y  |
| 5. Study setting mentioned                           | Y  | Y  | Y  | Y  | Y  | Y  | Y  | Y  | Y  | Y  | Y  | Y  | Y  | Y  | Y  | Y  | Y  | Y  | Y  | N  | Y  | Y  | Y  | Y  |
| 6. Dates when conducted stated                       | Y  | Y  | Y  | Y  | Y  | Y  | Y  | Y  | Y  | Y  | Y  | Y  | Y  | Y  | Y  | Y  | Y  | Y  | Y  | Y  | Y  | Y  | Y  | Y  |
| 7. Eligibility criteria stated                       | Y  | Y  | Y  | Y  | Y  | Y  | Y  | Y  | Y  | Y  | Y  | Y  | Y  | Y  | Y  | Y  | Y  | Y  | Y  | Y  | Y  | Y  | Y  | Y  |
| 8. Number of participants justified                  | N  | N  | N  | N  | N  | N  | N  | N  | N  | N  | N  | N  | N  | N  | N  | N  | N  | N  | N  | N  | N  | N  | N  | N  |
| 9. No. meeting eligibility criteria stated           | Y  | Y  | Y  | N  | N  | N  | N  | N  | N  | Y  | N  | Y  | N  | N  | Y  | Y  | N  | N  | Y  | Y  | Y  | Y  | Y  | N  |
| 10. Reasons for eligible stated                      | N  | N  | N  | N  | N  | Y  | N  | N  | N  | N  | N  | Y  | N  | N  | Y  | Y  | N  | N  | Y  | Y  | Y  | Y  | Y  | Y  |
| 11. No. of consenters stated                         | N  | N  | Y  | Y  | Y  | Y  | N  | Y  | Y  | Y  | N  | Y  | N  | N  | N  | Y  | Y  | N  | Y  | Y  | Y  | Y  | Y  | N  |
| 12. Reasons for refusal to consent stated            | N  | N  | N  | N  | N  | N  | N  | N  | N  | N  | N  | N  | N  | N  | N  | N  | N  | N  | N  | N  | N  | N  | N  | N  |
| 13. Consenters compared with no consenters           | N  | N  | N  | N  | N  | N  | N  | N  | N  | N  | N  | N  | N  | N  | N  | Y  | N  | N  | N  | N  | N  | N  | N  | N  |
| 14. No. of participants at beginning stated?         | Y  | Y  | Y  | Y  | Y  | Y  | Y  | Y  | Y  | Y  | Y  | Y  | Y  | Y  | Y  | Y  | Y  | Y  | Y  | Y  | Y  | Y  | Y  | Y  |
| 15. Methods of data collection stated?               | Y  | Y  | Y  | Y  | Y  | Y  | N  | Y  | Y  | Y  | N  | Y  | Y  | Y  | Y  | Y  | Y  | Y  | Y  | Y  | Y  | Y  | Y  | Y  |
| 16. Validity of measurement methods mentioned        | N  | N  | N  | N  | N  | N  | Y  | Y  | Y  | N  | N  | N  | N  | N  | N  | N  | N  | N  | Y  | Y  | Y  | Y  | Y  | Y  |
| 17. Confounders mentioned                            | N  | Y  | N  | Y  | Y  | N  | N  | Y  | Y  | Y  | N  | Y  | Y  | Y  | Y  | N  | Y  | Y  | Y  | Y  | N  | Y  | N  | N  |
| 18. No. of participants at each stage/wave specified | Y  | Y  | Y  | Y  | Y  | Y  | Y  | Y  | Y  | Y  | Y  | Y  | Y  | Y  | Y  | Y  | Y  | Y  | Y  | Y  | Y  | Y  | Y  | Y  |
| 19. Reasons for loss to follow-up                    | N  | Y  | N  | Y  | N  | Y  | N  | N  | N  | N  | N  | Y  | Y  | Y  | N  | Y  | Y  | N  | Y  | Y  | N  | Y  | Y  | Y  |
| 20. Missingness of data items mentioned?             | N  | N  | N  | N  | Y  | Y  | Y  | Y  | N  | Y  | Y  | Y  | Y  | Y  | Y  | N  | N  | Y  | Y  | Y  | N  | Y  | Y  | Y  |
| 21. Type of analyses stated?                         | Y  | Y  | Y  | Y  | Y  | Y  | Y  | Y  | Y  | Y  | Y  | Y  | Y  | Y  | Y  | Y  | Y  | Y  | Y  | Y  | Y  | Y  | Y  | Y  |
| 22. "Longitudinal" analysis methods stated           | Y  | Y  | Y  | Y  | N  | Y  | Y  | N  | N  | N  | Y  | N  | N  | N  | N  | Y  | N  | N  | Y  | Y  | Y  | Y  | Y  | Y  |
| 23. Absolute effect sizes reported                   | Y  | Y  | Y  | Y  | Y  | Y  | N  | Y  | Y  | Y  | N  | N  | N  | Y  | Y  | Y  | Y  | N  | Y  | Y  | Y  | Y  | Y  | Y  |
| 24. Relative effect sizes reported                   | Y  | Y  | Y  | Y  | Y  | Y  | Y  | Y  | Y  | Y  | N  | Y  | Y  | Y  | Y  | Y  | Y  | Y  | Y  | Y  | Y  | Y  | Y  | Y  |
| 25. Loss to follow-up taken for analysis             | N  | N  | N  | Y  | N  | Y  | N  | N  | N  | N  | N  | N  | N  | N  | Y  | N  | Y  | N  | N  | N  | N  | Y  | N  | N  |
| 26. Confounders accounted for in analyses            | N  | Y  | Y  | Y  | Y  | N  | N  | Y  | Y  | Y  | N  | N  | Y  | Y  | Y  | Y  | Y  | Y  | Y  | Y  | Y  | Y  | Y  | N  |
| 27. Missing data accounted for in the analyses       | N  | N  | N  | N  | N  | N  | Y  | N  | N  | N  | Y  | N  | N  | N  | Y  | N  | N  | N  | N  | N  | N  | N  | N  | N  |
| 28. Impact of biases assessed                        | Y  | N  | N  | Y  | Y  | N  | N  | Y  | N  | Y  | N  | N  | Y  | Y  | N  | Y  | Y  | Y  | Y  | Y  | Y  | Y  | Y  | Y  |
| 29. Results related back to the target population    | N  | N  | Y  | N  | Y  | N  | Y  | N  | Y  | N  | N  | Y  | Y  | N  | Y  | Y  | Y  | Y  | N  | Y  | N  | N  | N  | Y  |
| 30. Discussion of generalizability                   | N  | N  | Y  | N  | N  | N  | Y  | N  | Y  | N  | N  | N  | Y  | N  | Y  | Y  | N  | N  | N  | Y  | N  | N  | N  | Y  |
| Total Score                                          | 16 | 18 | 19 | 20 | 19 | 19 | 17 | 19 | 19 | 19 | 13 | 19 | 18 | 16 | 22 | 23 | 20 | 17 | 23 | 24 | 20 | 24 | 20 | 20 |

1.Aranda (2011), 2. Ensrud (2011), 3. Talegawkar (2012), 4. Baylis (2013), 5. León-Muñoz (2014), 6. Hoogendijk (2014), 7. Myers (2014), 8. Lana (2015), 9. Chan (2015), 10. Garcia-Esquinas<sup>2</sup> (2016), 11. Monin (2016), 12. Garcia-Esquinas<sup>1</sup> (2016), 13. Ortola (2016), 14. Sandoval-Insusti (2016), 15. Woods (2005), 16. Semba (2006), 17. Ottenbacher (2009), 18. Lakey (2012), 19. Cawthon (2009), 20. Gruenewald (2009), 21. Hyde (2010), 22. Rabassa (2015), 23. McHugh (2016).
