# Supplementary material for: Risk factors and protective factors associated with incident or increase of frailty among community-dwelling older adults: A systematic review of longitudinal studies
Source: PubMed Central journal article supplement (PMC5472269; doi:10.1371/journal.pone.0178383), 2017-06-15
Supplement: pone.0178383.s003.pdf [file pone.0178383.s003.pdf]

## S1 File. The complete search strategies for all databases

| Databases        | Hits        | After duplication |
|------------------|-------------|-------------------|
| Embase.com       | 2400        | 2346              |
| Medline Ovid     | 2095        | 532               |
| Web of science   | 1787        | 484               |
| Cochrane         | 230         | 17                |
| PsycINFO Ovid    | 496         | 100               |
| CINAHL EBSCOhost | 901         | 261               |
| Google scholar   | 200         | 89                |
| <b>Total</b>     | <b>8109</b> | <b>3829</b>       |

### Embase.com 2400

('independent living'/exp OR 'community'/de OR 'community living'/de OR 'home'/de OR (((independent\* OR at-home) NEAR/3 living) OR (aging NEAR/3 place) OR (communit\* NEAR/6 (dwell\* OR living OR resid\*))) OR 'liv\* alone' ):ab,ti) AND ('frail elderly'/de OR (frail\*):ab,ti) AND ('biological factor'/de OR 'social aspect'/de OR 'social status'/exp OR 'social behavior'/exp OR 'psychological aspect'/de OR demography'/de OR age'/de OR gender'/de OR 'sex difference'/de OR 'social determinants of health'/de OR 'income'/de OR 'lowest income group'/de OR 'socioeconomics'/de OR 'educational status'/de OR 'body equilibrium'/de OR depression'/de OR 'anxiety'/de OR 'balance disorder'/exp OR 'cognitive defect'/exp OR 'cognition'/exp OR 'daily life activity'/exp OR 'physical activity'/de OR disability'/de OR 'disabled person'/de OR 'physical mobility'/de OR 'physical performance'/de OR 'walking'/de OR 'comorbidity'/de OR risk'/exp OR 'self concept'/de OR 'self report'/de OR questionnaire'/de OR 'assessment of humans'/exp OR 'motor dysfunction'/de OR 'walking difficulty'/de OR (((biological\* OR physical\* OR social\* OR psycholog\* OR functional\* OR clinical\* OR living OR residence\* OR age OR gender OR sex OR psychiat\* OR neuropsychiat\* OR sociological\*) NEAR/10 (factor\* OR aspect\* OR characteristic\* OR correlat\* OR condition\* OR differ\* OR relation\* OR likely OR risk\* OR associat\* OR symptom\* OR influen\*)) OR sociodemograph\* OR socio-demograph\* OR lifestyle OR life-style OR financial\* OR mobil\* OR impairment\* OR balance OR adl OR auditor\* OR visual\* OR grip OR strength OR fatigue OR memory OR depress\* OR anxi\* OR energy-reserve OR vulnerab\* OR perform\* OR stress OR coping OR lonel\* OR Resilien\* OR income\* OR socioeconomic\* OR education\* OR determinant\* OR cognit\* OR (postur\* NEAR/3 instab\*) OR equilibr\* OR (characterist\* NEAR/3 discriminat\*) OR (daily NEAR/3 (life OR living) NEAR/6 activit\*) OR ((physical\* OR motor\*) NEAR/3 activ\*) OR disab\* OR walking OR risk OR risks OR (self NEXT/1 (rat\* OR report\*)) OR subjectiv\* OR objectiv\* OR questionnaire\* OR comorbid\* OR scale OR score OR assessment\* OR (social NEAR/3 (status\* OR class\* OR background\* OR behav\* OR identi\*)) OR poverty OR pension\* OR ((male\* OR men) NEAR/3 (female\* OR women) NEAR/6 (differen\* OR more OR less OR likel\*))) :ab,ti)

**Medline Ovid 2095**

("Independent Living"/ OR "Residence Characteristics"/ OR (((independent\* OR at-home) ADJ3 living) OR (aging ADJ3 place) OR (communit\* ADJ6 (dwell\* OR living OR resid\*)) OR "liv\* alone" ).ab,ti.) AND ("Frail Elderly"/ OR (frail\*).ab,ti.) AND ("Biological Factors"/ OR "Social Class"/ OR exp "Social Behavior"/ OR "psychology".xs. OR demography/ OR Age Factors/ OR sex/ OR "Sex Characteristics"/ OR "Social Determinants of Health"/ OR "Income"/ OR exp "Sociological Factors"/ OR "Posture"/ OR exp depression/ OR exp "anxiety"/ OR exp "Cognition Disorders"/ OR exp "cognition"/ OR "Activities of Daily Living"/ OR "Motor Activity"/ OR Disability Evaluation/ OR "Disabled Persons"/ OR "Mobility Limitation"/ OR "walking"/ OR "comorbidity"/ OR exp risk/ OR "self concept"/ OR "self report"/ OR exp questionnaires/ OR (((biological\* OR physical\* OR social\* OR psycholog\* OR functional\* OR clinical\* OR living OR residence\* OR age OR gender OR sex OR psychiat\* OR neuropsychiat\* OR sociological\*) ADJ10 (factor\* OR aspect\* OR characteristic\* OR correlat\* OR condition\* OR differ\* OR relation\* OR likely OR risk\* OR associat\* OR symptom\* OR influen\*)) OR sociodemograph\* OR socio-demograph\* OR lifestyle OR life-style OR financial\* OR mobilit\* OR impairment\* OR balance OR adl OR auditor\* OR visual\* OR grip OR strength OR fatigue OR memory OR depress\* OR anxi\* OR energy-reserve OR vulnerab\* OR perform\* OR stress OR coping OR lonel\* OR Resilien\* OR income\* OR socioeconomic\* OR education\* OR determinant\* OR cognit\* OR (postur\* ADJ3 instab\*) OR equilibr\* OR (characterist\* ADJ3 discriminat\*) OR (daily ADJ3 (life OR living) ADJ6 activit\*) OR ((physical\* OR motor\*) ADJ3 activ\*) OR disab\* OR walking OR risk OR risks OR (self ADJ (rat\* OR report\*)) OR subjectiv\* OR objectiv\* OR questionnaire\* OR comorbid\* OR scale OR score OR assessment\* OR (social ADJ3 (status\* OR class\* OR background\* OR behav\* OR identi\*)) OR poverty OR pension\* OR ((male\* OR men) ADJ3 (female\* OR women) ADJ6 (differen\* OR more OR less OR likel\*))).ab,ti.)

**PsycINFO Ovid 496**

((((independent\* OR at-home) ADJ3 living) OR (aging ADJ3 place) OR (communit\* ADJ6 (dwell\* OR living OR resid\*)) OR "liv\* alone" ).ab,ti.) AND ((frail\*).ab,ti.) AND (exp "psychology"/ OR exp "depression (emotion)"/ OR exp "anxiety"/ OR exp "anxiety disorders"/ OR exp "Cognitive Impairment"/ OR exp "cognition"/ OR "self-concept"/ OR (((biological\* OR physical\* OR social\* OR psycholog\* OR functional\* OR clinical\* OR living OR residence\* OR age OR gender OR sex OR psychiat\* OR neuropsychiat\* OR sociological\*) ADJ10 (factor\* OR aspect\* OR characteristic\* OR correlat\* OR condition\* OR differ\* OR relation\* OR likely OR risk\* OR associat\* OR symptom\* OR influen\*)) OR sociodemograph\* OR socio-demograph\* OR lifestyle OR life-style OR financial\* OR mobilit\* OR impairment\* OR balance OR adl OR auditor\* OR visual\* OR grip OR strength OR fatigue OR memory OR depress\* OR anxi\* OR energy-reserve OR vulnerab\* OR perform\* OR stress OR coping OR lonel\* OR Resilien\* OR income\* OR socioeconomic\* OR education\* OR determinant\* OR cognit\* OR (postur\* ADJ3 instab\*) OR equilibr\* OR (characterist\* ADJ3 discriminat\*) OR (daily ADJ3 (life OR living) ADJ6 activit\*) OR ((physical\* OR motor\*) ADJ3 activ\*) OR disab\* OR walking OR risk OR risks OR (self ADJ (rat\* OR report\*)) OR subjectiv\* OR objectiv\* OR questionnaire\* OR comorbid\* OR scale OR score OR assessment\* OR (social ADJ3 (status\* OR class\* OR background\* OR behav\* OR identi\*)) OR poverty OR pension\* OR ((male\* OR men) ADJ3 (female\* OR women) ADJ6 (differen\* OR more OR less OR likel\*))).ab,ti.)

(MH "Community Living+" OR AB (((independent\* OR at-home) N2 living) OR (aging N2 place) OR (communit\* N5 (dwell\* OR living OR resid\*)) OR "liv\* alone" ) OR TI (((independent\* OR at-home) N2 living) OR (aging N2 place) OR (communit\* N5 (dwell\* OR living OR resid\*)) OR "liv\* alone" )) AND ("Frail Elderly+" OR MH "Frailty Syndrome" OR TI (frail\*) OR AB (frail\*)) AND (MH "Biological Factors+" OR MH "Social Class+" OR MH "Social Behavior+" OR MH demography OR MH Age Factors OR MH sex OR MH "Social Determinants of Health" OR MH "Income" OR MH "Posture" OR MH depression+ OR MH "anxiety+" OR MH "Cognition Disorders+" OR MH "cognition+" OR MH "Activities of Daily Living+" OR MH "Motor Activity+" OR MH Disability Evaluation+ OR MH "Physical Mobility+" OR MH "walking+" OR MH "comorbidity" OR MH "risk factors+" OR "self concept+" OR "self report+" OR MH questionnaires+ OR TI (((biological\* OR physical\* OR social\* OR psycholog\* OR functional\* OR clinical\* OR living OR residence\* OR age OR gender OR sex OR psychiat\* OR neuropsychiat\* OR sociological\*) N9 (factor\* OR aspect\* OR characteristic\* OR correlat\* OR condition\* OR differ\* OR relation\* OR likely OR risk\* OR associat\* OR symptom\* OR influen\*)) OR sociodemograph\* OR socio-demograph\* OR lifestyle OR life-style OR financial\* OR mobilite\* OR impairment\* OR balance OR adl OR auditor\* OR visual\* OR grip OR strength OR fatigue OR memory OR depress\* OR anxi\* OR energy-reserve OR vulnerab\* OR perform\* OR stress OR coping OR lonel\* OR Resilien\* OR income\* OR socioeconomic\* OR education\* OR determinant\* OR cognit\* OR (postur\* N2 instab\*) OR equilibr\* OR (characterist\* N2 discriminat\*) OR (daily N2 (life OR living) N5 activit\*) OR ((physical\* OR motor\*) N2 activ\*) OR disab\* OR walking OR risk OR risks OR (self N1 (rat\* OR report\*)) OR subjectiv\* OR objectiv\* OR questionnaire\* OR comorbid\* OR scale OR score OR assessment\* OR (social N2 (status\* OR class\* OR background\* OR behav\* OR identi\*)) OR poverty OR pension\* OR ((male\* OR men) N2 (female\* OR women) N5 (differen\* OR more OR less OR likel\*)) OR AB (((biological\* OR physical\* OR social\* OR psycholog\* OR functional\* OR clinical\* OR living OR residence\* OR age OR gender OR sex OR psychiat\* OR neuropsychiat\* OR sociological\*) N9 (factor\* OR aspect\* OR characteristic\* OR correlat\* OR condition\* OR differ\* OR relation\* OR likely OR risk\* OR associat\* OR symptom\* OR influen\*)) OR sociodemograph\* OR socio-demograph\* OR lifestyle OR life-style OR financial\* OR mobilite\* OR impairment\* OR balance OR adl OR auditor\* OR visual\* OR grip OR strength OR fatigue OR memory OR depress\* OR anxi\* OR energy-reserve OR vulnerab\* OR perform\* OR stress OR coping OR lonel\* OR Resilien\* OR income\* OR socioeconomic\* OR education\* OR determinant\* OR cognit\* OR (postur\* N2 instab\*) OR equilibr\* OR (characterist\* N2 discriminat\*) OR (daily N2 (life OR living) N5 activit\*) OR ((physical\* OR motor\*) N2 activ\*) OR disab\* OR walking OR risk OR risks OR (self N1 (rat\* OR report\*)) OR subjectiv\* OR objectiv\* OR questionnaire\* OR comorbid\* OR scale OR score OR assessment\* OR (social N2 (status\* OR class\* OR background\* OR behav\* OR identi\*)) OR poverty OR pension\* OR ((male\* OR men) N2 (female\* OR women) N5 (differen\* OR more OR less OR likel\*))))))

### Cochrane 230

(((((independent\* OR at-home) NEAR/3 living) OR (aging NEAR/3 place) OR (communit\* NEAR/6 (dwell\* OR living OR resid\*)) OR 'liv\* alone' ):ab,ti) AND ((frail\*):ab,ti) AND (((biological\* OR physical\* OR social\* OR psycholog\* OR functional\* OR clinical\* OR living OR residence\* OR age OR gender OR sex OR psychiat\* OR neuropsychiat\* OR sociological\*) NEAR/10 (factor\* OR aspect\* OR characteristic\* OR

correlat\* OR condition\* OR differ\* OR relation\* OR likely OR risk\* OR associat\* OR symptom\* OR influen\*) OR sociodemograph\* OR socio-demograph\* OR lifestyle OR life-style OR financial\* OR mobil\* OR impairment\* OR balance OR adl OR auditor\* OR visual\* OR grip OR strength OR fatigue OR memory OR depress\* OR anxi\* OR energy-reserve OR vulnerab\* OR perform\* OR stress OR coping OR lonel\* OR Resilien\* OR income\* OR socioeconomic\* OR education\* OR determinant\* OR cognit\* OR (postur\* NEAR/3 instab\*) OR equilibr\* OR (characterist\* NEAR/3 discriminat\*) OR (daily NEAR/3 (life OR living) NEAR/6 activit\*) OR ((physical\* OR motor\*) NEAR/3 activ\*) OR disab\* OR walking OR risk OR risks OR (self NEXT/1 (rat\* OR report\*)) OR subjectiv\* OR objectiv\* OR questionnaire\* OR comorbid\* OR scale OR score OR assessment\* OR (social NEAR/3 (status\* OR class\* OR background\* OR behav\* OR identi\*)) OR poverty OR pension\* OR ((male\* OR men) NEAR/3 (female\* OR women) NEAR/6 (differen\* OR more OR less OR likel\*)):ab,ti)

**Web of science 1787**

TS((((independent\* OR at-home) NEAR/2 living) OR (aging NEAR/2 place) OR (communit\* NEAR/5 (dwell\* OR living OR resid\*)) OR "liv\* alone" )) AND ((frail\*)) AND (((biological\* OR physical\* OR social\* OR psycholog\* OR functional\* OR clinical\* OR living OR residence\* OR age OR gender OR sex OR psychiat\* OR neuropsychiat\* OR sociological\*) NEAR/9 (factor\* OR aspect\* OR characteristic\* OR correlat\* OR condition\* OR differ\* OR relation\* OR likely OR risk\* OR associat\* OR symptom\* OR influen\*)) OR sociodemograph\* OR socio-demograph\* OR lifestyle OR life-style OR financial\* OR mobil\* OR impairment\* OR balance OR adl OR auditor\* OR visual\* OR grip OR strength OR fatigue OR memory OR depress\* OR anxi\* OR energy-reserve OR vulnerab\* OR perform\* OR stress OR coping OR lonel\* OR Resilien\* OR income\* OR socioeconomic\* OR education\* OR determinant\* OR cognit\* OR (postur\* NEAR/2 instab\*) OR equilibr\* OR (characterist\* NEAR/2 discriminat\*) OR (daily NEAR/2 (life OR living) NEAR/5 activit\*) OR ((physical\* OR motor\*) NEAR/2 activ\*) OR disab\* OR walking OR risk OR risks OR (self NEAR/1 (rat\* OR report\*)) OR subjectiv\* OR objectiv\* OR questionnaire\* OR comorbid\* OR scale OR score OR assessment\* OR (social NEAR/2 (status\* OR class\* OR background\* OR behav\* OR identi\*)) OR poverty OR pension\* OR ((male\* OR men) NEAR/2 (female\* OR women) NEAR/5 (differen\* OR more OR less OR likel\*))))))

**Google scholar 200**

"independent living"|"aging in place"|"community dwelling|dwellers" frail|frailty  
"biological|physical|social|psychological  
factors|aspects|characteristics" |sociodemographic|socioeconomics|determinants|"social  
status|class|background" |poverty|income
